# Supplementary material for: Weed Suppression, Biomass and Nitrogen Accumulation in Mixed-Species and Single-Species Cover Crops in a Tropical Sugarcane Fallow
Source: MDPI journal article supplement (doi:10.3390/agriculture11070640), 2021-07-08

**Supplementary Table S1 – Nutrient concentrations in cover crop shoots at termination at field trial 2 (2018-19)**

|                         |           | Macronutrient (%) |           |            |            |            |          |  | Micronutrient (mg kg <sup>-1</sup> ) |          |           |            |          |
|-------------------------|-----------|-------------------|-----------|------------|------------|------------|----------|--|--------------------------------------|----------|-----------|------------|----------|
|                         | Nitrogen  | Phosphorus        | Potassium | Sulfur     | Calcium    | Magnesium  | Carbon   |  | Copper                               | Zinc     | Manganese | Iron       | Boron    |
| Soybean (cv. Leichardt) | 2.5 ± 0.3 | 0.3 ± 0.04        | 2.5 ± 0.1 | 0.2 ± 0.02 | 1.1 ± 0.13 | 0.3 ± 0.03 | 42 ± 1.1 |  | 8.1 ± 0.6                            | 34 ± 3.2 | 167 ± 32  | 413 ± 94   | 23 ± 1.8 |
| Cowpea Ebony            | 2.3 ± 0.1 | 0.3 ± 0.01        | 2.5 ± 0.1 | 0.2 ± 0.01 | 1.0 ± 0.02 | 0.3 ± 0.00 | 41 ± 1.4 |  | 5.4 ± 0.3                            | 40 ± 4.6 | 218 ± 46  | 449 ± 141  | 19 ± 1.2 |
| Lablab                  | 2.5 ± 0.1 | 0.4 ± 0.04        | 2.9 ± 0.2 | 0.2 ± 0.00 | 1.3 ± 0.05 | 0.2 ± 0.01 | 40 ± 1.2 |  | 8.7 ± 0.3                            | 40 ± 5.2 | 227 ± 28  | 787 ± 120  | 24 ± 1.3 |
| Jap Millet              | 0.6 ± 0.0 | 0.1 ± 0.00        | 1.4 ± 0.1 | 0.2 ± 0.01 | 0.2 ± 0.01 | 0.2 ± 0.01 | 38 ± 2.0 |  | 6.2 ± 0.4                            | 37 ± 6.5 | 325 ± 25  | 1384 ± 317 | 4 ± 0.2  |
| Sunn hemp               | 1.5 ± 0.1 | 0.2 ± 0.01        | 2.3 ± 0.2 | 0.2 ± 0.02 | 0.8 ± 0.12 | 0.3 ± 0.03 | 41 ± 1.7 |  | 6.3 ± 0.6                            | 23 ± 4.2 | 156 ± 46  | 279 ± 79   | 20 ± 2.5 |
| Sunflower               | 1.2 ± 0.1 | 0.5 ± 0.03        | 4.0 ± 0.2 | 0.2 ± 0.01 | 1.7 ± 0.21 | 0.3 ± 0.02 | 37 ± 2.3 |  | 19 ± 1.1                             | 73 ± 4.4 | 296 ± 35  | 720 ± 301  | 23 ± 0.9 |
| Velvet bean             | 2.6 ± 0.3 | 0.3 ± 0.02        | 2.4 ± 0.2 | 0.2 ± 0.01 | 0.9 ± 0.10 | 0.2 ± 0.02 | 40 ± 1.8 |  | 13 ± 1.2                             | 35 ± 0.5 | 260 ± 38  | 622 ± 73   | 19 ± 1.3 |
| Burgundy bean           | 2.1 ± 0.1 | 0.3 ± 0.01        | 2.4 ± 0.1 | 0.2 ± 0.00 | 1.2 ± 0.10 | 0.3 ± 0.02 | 37 ± 0.8 |  | 10 ± 0.6                             | 38 ± 12  | 290 ± 52  | 1109 ± 372 | 17 ± 0.6 |
| Pigeon Pea              | 2.4 ± 0.3 | 0.3 ± 0.02        | 1.9 ± 0.2 | 0.2 ± 0.01 | 0.7 ± 0.08 | 0.2 ± 0.02 | 42 ± 0.7 |  | 9.4 ± 0.7                            | 33 ± 5.8 | 158 ± 15  | 588 ± 165  | 16 ± 1.8 |
| Tillage Radish          | 1.6 ± 0.2 | 0.5 ± 0.10        | 3.5 ± 0.5 | 0.3 ± 0.04 | 1.7 ± 0.26 | 0.3 ± 0.04 | 31 ± 3.2 |  | 5.9 ± 0.7                            | 41 ± 3.3 | 141 ± 11  | 1999 ± 700 | 20 ± 1.7 |
| Rice                    | 0.9 ± 0.1 | 0.3 ± 0.03        | 1.9 ± 0.1 | 0.2 ± 0.00 | 0.3 ± 0.03 | 0.2 ± 0.01 | 34± 1.0  |  | 7.1 ± 0.4                            | 44 ± 7.3 | 759 ± 40  | 963 ± 316  | 5 ± 0.3  |
| Soybean (cv. Mossman)   | 2.8 ± 0.0 | 0.4 ± 0.01        | 2.7 ± 0.1 | 0.2 ± 0.01 | 0.9 ± 0.04 | 0.3 ± 0.01 | 40 ± 1.1 |  | 7.9 ± 0.1                            | 36 ± 4.1 | 105 ± 13  | 390 ± 94   | 23 ± 1.7 |
| Soybean (cv. Kuranda)   | 2.3 ± 0.3 | 0.3 ± 0.04        | 2.5 ± 0.3 | 0.2 ± 0.01 | 1.3 ± 0.13 | 0.4 ± 0.03 | 41 ± 1.3 |  | 7.5 ± 0.5                            | 33 ± 2.3 | 190 ± 40  | 388 ± 74   | 25 ± 2.0 |
| mix 1                   | 2.2 ± 0.1 | 0.3 ± 0.02        | 2.7 ± 0.1 | 0.2 ± 0.01 | 1.0 ± 0.03 | 0.3 ± 0.02 | 40 ± 1.8 |  | 6.7 ± 0.4                            | 34 ± 0.5 | 314 ± 34  | 348 ± 89   | 24 ± 0.9 |
| mix 2                   | 2.4 ± 0.1 | 0.3 ± 0.01        | 2.9 ± 0.1 | 0.2 ± 0.01 | 1.1 ± 0.05 | 0.3 ± 0.01 | 40 ± 1.6 |  | 7.2 ± 0.1                            | 40 ± 1.3 | 281 ± 49  | 311 ± 53   | 26 ± 0.5 |
| mix 3                   | 2.5 ± 0.1 | 0.3 ± 0.02        | 3.2 ± 0.3 | 0.2 ± 0.01 | 1.2 ± 0.04 | 0.3 ± 0.02 | 40 ± 1.5 |  | 6.5 ± 0.7                            | 40 ± 0.3 | 356 ± 38  | 293 ± 75   | 24 ± 2.3 |

**Supplementary Figure S1** – Radish plants under monoculture (top panel) and in a mixed species plot (bottom panel). Note yellowing of leaves consistent with nitrogen deficiency in plants grown as a monoculture.

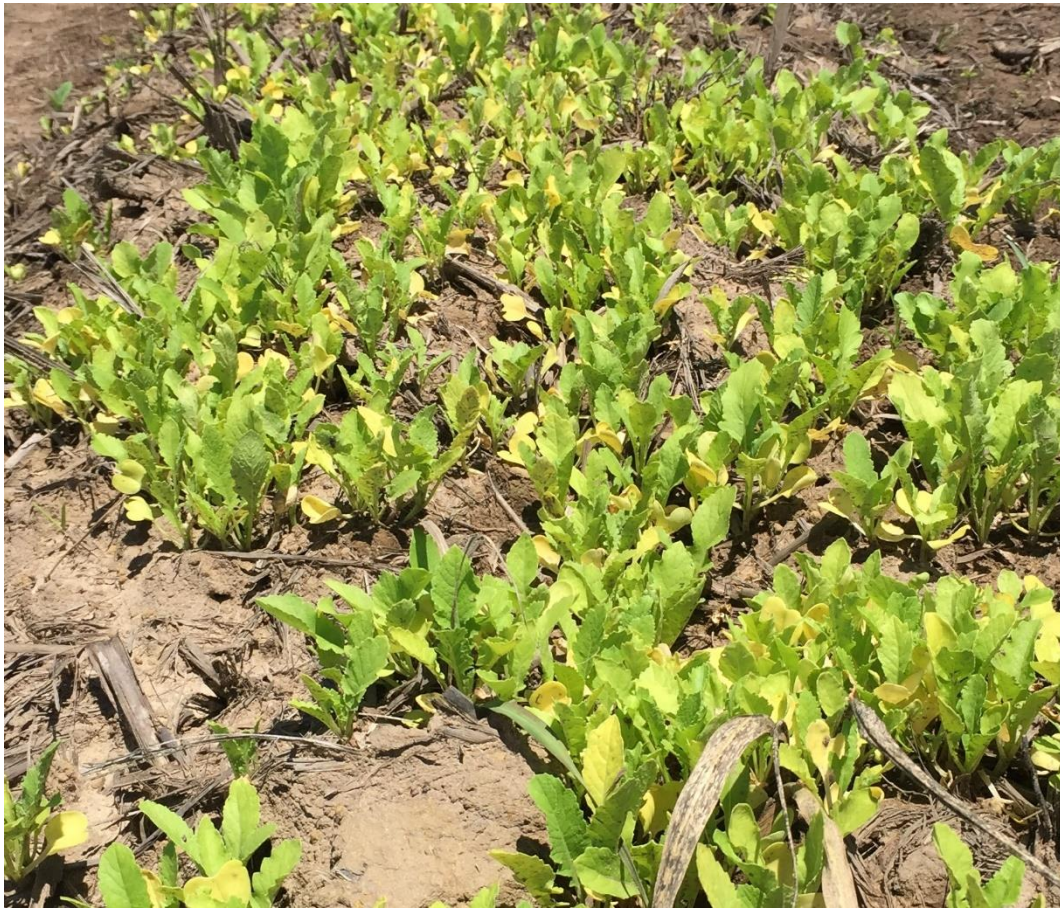

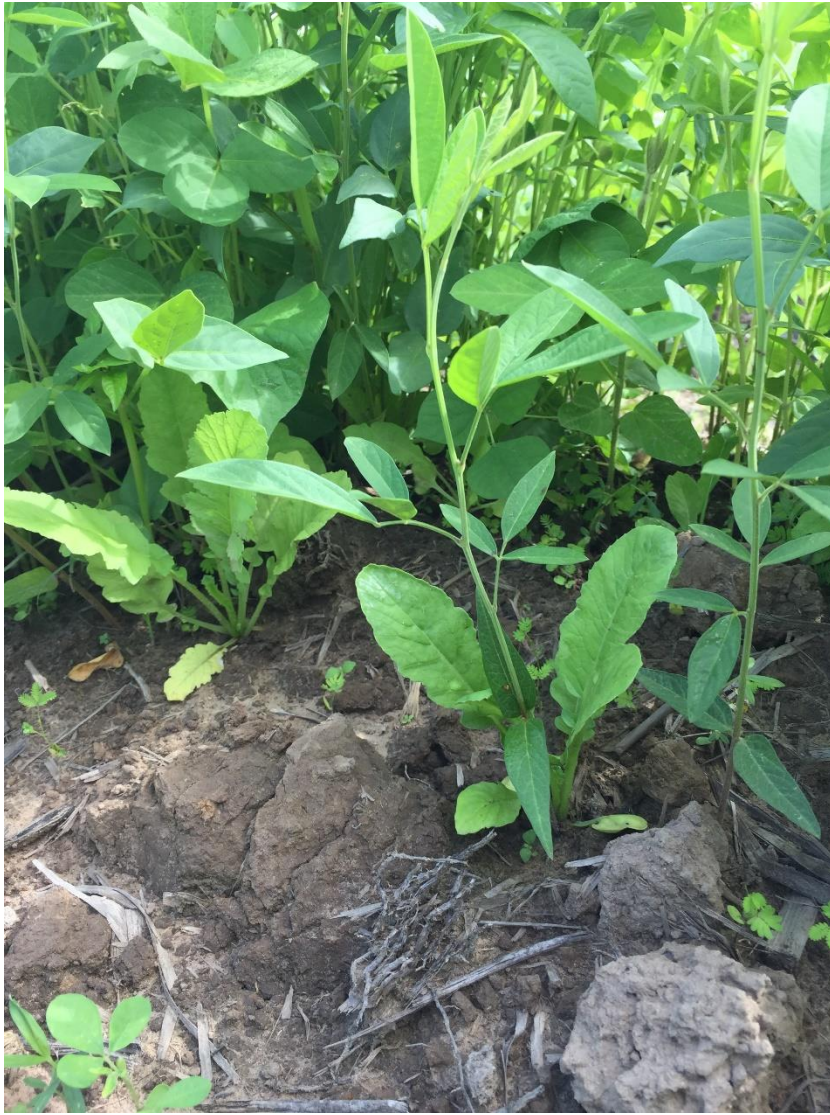

Supplement: s1 [file s1]
